Development 134, 1454 (2007) doi:10.1242/dev.02841

**$\beta$ -catenin, MAPK and Smad signaling during early *Xenopus* development**  
**Anne Schohl and François Fagotto**

The link for the supplementary material published in *Development* **129**, 37-52 is incorrect.

The correct link is <http://dev.biologists.org/cgi/content/full/129/1/37/DC1>.

The authors apologise to readers for this mistake.
